# Supplementary material
Source: publisher site journal article supplement (https://www.dovepress.com/article/328964)
Supplement: Supplementary file 1 [file get_supplementary_file.php]

**Supplementary Table 1. GO enrichment analyses of the identified DEGs**

| ONTOLOGY | ID | Description | GeneRatio | pvalue | p.adjust | qvalue | geneID | Count |
| --- | --- | --- | --- | --- | --- | --- | --- | --- |
| BP | GO:0060251 | regulation of glial cell proliferation | 5/152 | 8.9259E-06 | 0.01733449 | 0.01591379 | TSPO/PRKCH/PRKCI/SKI/TNF | 5 |
| BP | GO:0060252 | positive regulation of glial cell proliferation | 4/152 | 1.4882E-05 | 0.01733449 | 0.01591379 | TSPO/PRKCH/PRKCI/TNF | 4 |
| BP | GO:0008202 | steroid metabolic process | 12/152 | 1.7498E-05 | 0.01733449 | 0.01591379 | APOA2/TSPO/CGA/CYP2C19/CYP2D6/MT3/RXRA/SNAI2/SRD5A2/TNF/UGT2B7/APOL2 | 12 |
| BP | GO:0002719 | negative regulation of cytokine production involved in immune response | 4/152 | 4.6757E-05 | 0.03138791 | 0.02881543 | ANGPT1/APOA2/HFE/TNF | 4 |
| BP | GO:0014009 | glial cell proliferation | 5/152 | 5.2806E-05 | 0.03138791 | 0.02881543 | TSPO/PRKCH/PRKCI/SKI/TNF | 5 |
| BP | GO:0002701 | negative regulation of production of molecular mediator of immune response | 4/152 | 0.00018167 | 0.0814627 | 0.07478618 | ANGPT1/APOA2/HFE/TNF | 4 |
| BP | GO:0002791 | regulation of peptide secretion | 13/152 | 0.00023154 | 0.0814627 | 0.07478618 | ANGPT1/SLC25A4/ANXA4/APOA2/ARF1/SERPINB1/GCG/HFE/ICA1/MMP8/OPRM1/SLC2A1/TNF | 13 |
| BP | GO:0046916 | cellular transition metal ion homeostasis | 6/152 | 0.00025498 | 0.0814627 | 0.07478618 | ARF1/HFE/MT1G/MT3/SKP1/NCOA4 | 6 |
| BP | GO:0045807 | positive regulation of endocytosis | 7/152 | 0.00025947 | 0.0814627 | 0.07478618 | ANGPT1/APOA2/ARF1/DAB2/HFE/PTPRJ/TNF | 7 |
| BP | GO:0002739 | regulation of cytokine secretion involved in immune response | 3/152 | 0.0002741 | 0.0814627 | 0.07478618 | ANGPT1/APOA2/TNF | 3 |
| BP | GO:0050710 | negative regulation of cytokine secretion | 5/152 | 0.00034326 | 0.09274186 | 0.08514093 | ANGPT1/ANXA4/APOA2/SERPINB1/TNF | 5 |
| CC | GO:0005925 | focal adhesion | 13/153 | 1.7035E-05 | 0.00237179 | 0.00203879 | ARF1/DAB2/FLT1/ITGB4/NEDD9/DDR2/OPRM1/PPFIBP1/ITGA8/TSPAN9/CHP1/MPRIP/CORO1C | 13 |
| CC | GO:0005924 | cell-substrate adherens junction | 13/153 | 1.8407E-05 | 0.00237179 | 0.00203879 | ARF1/DAB2/FLT1/ITGB4/NEDD9/DDR2/OPRM1/PPFIBP1/ITGA8/TSPAN9/CHP1/MPRIP/CORO1C | 13 |
| CC | GO:0030055 | cell-substrate junction | 13/153 | 2.0388E-05 | 0.00237179 | 0.00203879 | ARF1/DAB2/FLT1/ITGB4/NEDD9/DDR2/OPRM1/PPFIBP1/ITGA8/TSPAN9/CHP1/MPRIP/CORO1C | 13 |
| CC | GO:0031252 | cell leading edge | 11/153 | 0.00031652 | 0.02761659 | 0.02373919 | ACTG2/ARF1/GABRA4/ITGB4/NEDD9/OPRM1/PRKCI/PTPRJ/ITGA8/WASF2/CORO1C | 11 |
| CC | GO:0042470 | melanosome | 5/153 | 0.00142328 | 0.0827876 | 0.07116412 | DCT/MYH11/MYO7A/SLC2A1/PDIA6 | 5 |
| CC | GO:0048770 | pigment granule | 5/153 | 0.00142328 | 0.0827876 | 0.07116412 | DCT/MYH11/MYO7A/SLC2A1/PDIA6 | 5 |
| CC | GO:0097733 | photoreceptor cell cilium | 5/153 | 0.00188792 | 0.08894879 | 0.07646028 | CNGB1/MYO7A/PDE6G/GRK1/SDCCAG8 | 5 |
| CC | GO:0097731 | 9+0 non-motile cilium | 5/153 | 0.00203894 | 0.08894879 | 0.07646028 | CNGB1/MYO7A/PDE6G/GRK1/SDCCAG8 | 5 |

GO: Gene Ontology. BP: biological process. CC: cellular component.
